# Supplementary material
Source: PubMed Central journal article supplement (PMC5885321)
Supplement: NIHMS696292-supplement-Supplemental.pdf [file NIHMS696292-supplement-Supplemental.pdf]

# Supplementary Materials for “Bayesian Multiresolution Variable Selection for Ultra-High Dimensional Neuroimaging Data”

by Yize Zhao, Jian Kang and Qi Long

## Appendix A: Standard Posterior Computation Algorithm

We provide the details of the standard posterior computation algorithm in Section 2.3 which is implemented via a Gibbs sampler. The joint posterior distribution of all the parameters given the data is

$$\begin{aligned} & \pi(\mathbf{z}, \boldsymbol{\beta}, \boldsymbol{\alpha}, \mathbf{c}, \boldsymbol{\gamma}, \sigma_\beta^2, \eta_1, \eta_2, \xi_1, \xi_2 \mid \mathbf{S}, \mathbf{X}, \mathbf{y}) \\ & \propto \pi(\mathbf{y} \mid \mathbf{z})\pi(\mathbf{z} \mid \boldsymbol{\beta}, \boldsymbol{\alpha}, \mathbf{c}, \boldsymbol{\gamma}, \mathbf{S}, \mathbf{X})\pi(\boldsymbol{\beta} \mid \sigma_\beta^2)\pi(\boldsymbol{\alpha}) \\ & \quad \pi(\mathbf{c} \mid \eta_1, \xi_1) \left[ \prod_{r=1}^R \pi(\boldsymbol{\gamma}_r \mid \eta_2, \xi_2) \right] \pi(\sigma_\beta^2)\pi(\boldsymbol{\eta})\pi(\boldsymbol{\xi}) \end{aligned} \quad (1)$$

where  $\boldsymbol{\eta} = (\eta_1, \eta_2)$  and  $\boldsymbol{\xi} = (\xi_1, \xi_2)$ .

In the Gibbs sampler, the sampling schemes are as follows.

**Sampling scheme for  $\mathbf{z}$ :** for  $i = 1, \dots, n$ , draw

$$\begin{aligned} & z_i \mid \boldsymbol{\beta}, \boldsymbol{\alpha}, \mathbf{c}, \boldsymbol{\gamma}, y_i, \mathbf{S}, \mathbf{X} \\ & \sim y_i \text{N}_{[0, +\infty)}(\tilde{\mu}_i, 1) + (1 - y_i) \text{N}_{(-\infty, 0)}(\tilde{\mu}_i, 1), \end{aligned} \quad (2)$$

where  $\text{N}_{\mathcal{A}}(\mu, \Sigma)$  denote a normal distribution with mean  $\mu$  and covariance  $\Sigma$  truncated on region  $\mathcal{A}$ , and  $\tilde{\mu}_i = \mathbf{S}_i \boldsymbol{\alpha} - \mathbf{X}_i \{\boldsymbol{\lambda} \circ \boldsymbol{\beta}\}$ , where  $\mathbf{S}_i, \mathbf{X}_i$  are row  $i$  for  $\mathbf{S}, \mathbf{X}$ .

**Sampling scheme for  $\boldsymbol{\alpha}$ :** draw

$$[\boldsymbol{\alpha} \mid \boldsymbol{\beta}, \mathbf{z}, \mathbf{c}, \boldsymbol{\gamma}, \mathbf{S}, \mathbf{X}] \sim \text{N}(\tilde{\boldsymbol{\mu}}_\alpha, \tilde{\boldsymbol{\Sigma}}_\alpha), \quad (3)$$

where  $\tilde{\boldsymbol{\Sigma}}_\alpha = (\mathbf{S}'\mathbf{S} + \sigma_\alpha^{-2}\mathbf{I}_p)^{-1}$  and  $\tilde{\boldsymbol{\mu}}_\alpha = \tilde{\boldsymbol{\Sigma}}_\alpha (\mathbf{z} - \mathbf{X} \{\boldsymbol{\lambda} \circ \boldsymbol{\beta}\}) \mathbf{S}$ .

**Sampling scheme for  $\sigma_\alpha^2$ :** draw

$$[\sigma_\alpha^2 \mid \boldsymbol{\alpha}] \sim \text{IG}(a_\alpha + P/2, b_\alpha + (1/2) \sum_{p=1}^P \alpha_p^2). \quad (4)$$

**Sampling scheme for  $\sigma_\beta^2$ :** draw

$$[\sigma_\beta^2 \mid \boldsymbol{\beta}] \sim \text{IG}(a_\beta + V/2, b_\beta + (1/2) \sum_{r=1}^R \sum_{v=1}^{V_r} \beta_{rv}^2). \quad (5)$$

**Sampling scheme for  $\mathbf{c}$ :** for  $r = 1, \dots, R$ , the full conditional of  $c_r$  is given by

$$\begin{aligned} & \pi(c_r \mid \boldsymbol{\beta}, \mathbf{z}, \boldsymbol{\alpha}, \mathbf{c}_{-r}, \boldsymbol{\gamma}, \mathbf{S}, \mathbf{X}) \\ & \propto \exp \left( \eta_1 \sum_{r=1}^R c_r + \xi_1 \sum_{r'=1}^R f_{r'r} I[c_{r'} = c_r] \right) \\ & \quad \prod_{i=1}^n \phi(z_i - \mathbf{S}_i \boldsymbol{\alpha} - \mathbf{X}_i \{\boldsymbol{\lambda} \circ \boldsymbol{\beta}\}), \end{aligned} \quad (6)$$

where  $\mathbf{c}_{-r} = (c_{r'}, r' \neq r)$ .

**Sampling scheme for  $\boldsymbol{\gamma}$ :** for  $r = 1, \dots, R$  and  $v = 1, \dots, V_r$ , the full conditional of  $\gamma_{rv}$  is given by

$$\begin{aligned} & \pi(\gamma_{rv} \mid \boldsymbol{\beta}, \mathbf{z}, \boldsymbol{\alpha}, \mathbf{c}, \boldsymbol{\gamma}_{-rv}, \mathbf{S}, \mathbf{X}) \\ & \propto \exp \left( \eta_2 \sum_{v=1}^{V_r} \gamma_{rv} + \xi_2 \sum_{v'=1}^{V_r} l_{rv'v} I[\gamma_{rv'} = \gamma_{rv}] \right) \\ & \quad \prod_{i=1}^n \phi(z_i - \mathbf{S}_i \boldsymbol{\alpha} - \mathbf{X}_i \{\boldsymbol{\lambda} \circ \boldsymbol{\beta}\}), \end{aligned} \quad (7)$$

where  $\boldsymbol{\gamma}_{-rv} = (\gamma_{st}, s \neq r \text{ or } t \neq v)$ .

**Sampling scheme for  $\eta$  and  $\xi$ :** the parameters in Ising priors are updated using the auxiliary variable method by Møller et al. [1].

**Sampling scheme for  $\boldsymbol{\beta}$ :** As discussed in Section 2.3, based on the full conditional, update  $\boldsymbol{\beta}$  via a block update.

## Appendix B: SRS-MCMC Algorithm

The updating scheme for  $\mathbf{z}^{(k)}$ ,  $\boldsymbol{\alpha}^{(k)}$ ,  $\boldsymbol{\beta}^{(k)}$ ,  $\sigma_{\boldsymbol{\beta}}^{2(k)}$ ,  $\boldsymbol{\eta}$  and  $\boldsymbol{\xi}$  follows the standard posterior computation algorithm in Appendix .

**Sampling scheme for  $\mathbf{c}^{(k)}$  and  $\boldsymbol{\gamma}^{(k)}$ :**

- when  $k = 1$ , for  $g = 1, \dots, G^{(k)}$ ;  $r = 1, \dots, R$ ;  $h = 1, \dots, H_r^{(k)}$ , the full conditionals of  $c_g^{(k)}$  and  $\gamma_{rh}^{(k)}$  are

$$\begin{aligned} & \pi(c_g^{(k)} \mid \boldsymbol{\beta}^{(k)}, \mathbf{z}^{(k)}, \boldsymbol{\alpha}^{(k)}, \mathbf{c}_{-g}^{(k)}, \boldsymbol{\gamma}^{(k)}, \mathbf{S}, \mathbf{X}) \\ & \propto \prod_{i=1}^n \phi \left( z_i^{(k)} - \mathbf{S}_i \boldsymbol{\alpha}^{(k)} - \mathbf{X}_i \{\boldsymbol{\lambda}^{(k)} \circ \boldsymbol{\beta}^{(k)}\} \right); \end{aligned} \quad (8)$$

$$\begin{aligned} & \pi(\gamma_{rh}^{(k)} \mid \boldsymbol{\beta}^{(k)}, \mathbf{z}^{(k)}, \boldsymbol{\alpha}^{(k)}, \mathbf{c}^{(k)}, \boldsymbol{\gamma}_{r[-h]}^{(k)}, \boldsymbol{\gamma}_{[-r]}^{(k)}, \mathbf{S}, \mathbf{X}) \\ & \propto \prod_{i=1}^n \phi \left( z_i^{(k)} - \mathbf{S}_i \boldsymbol{\alpha}^{(k)} - \mathbf{X}_i \{\boldsymbol{\lambda}^{(k)} \circ \boldsymbol{\beta}^{(k)}\} \right); \end{aligned} \quad (9)$$

- when  $1 < k < K$ , the sampling scheme is stated in Section 3.2 with the full conditional updates of  $c_g^{(k)}$  and  $\gamma_{rh}^{(k)}$  in the moving step.
- when  $k = K$ , the sampling scheme is stated in Section 3.2 with the full conditional updates of  $c_g^{(k)}$  and  $\gamma_{rh}^{(k)}$  in the moving step.

## Appendix C: fastSRS-MCMC Algorithm

The updating scheme for  $\mathbf{z}^{(k)}$ ,  $\boldsymbol{\alpha}^{(k)}$ ,  $\sigma_\beta^{2(k)}$ ,  $\boldsymbol{\eta}$  and  $\boldsymbol{\xi}$  follows the standard posterior computation algorithm in Appendix .

**Sampling scheme for  $\mathbf{c}^{(k)}$ ,  $\boldsymbol{\gamma}^{(k)}$ ,  $\tilde{\boldsymbol{\beta}}^{(k)}$ :**

- when  $k = 1$ , the full conditional of  $\mathbf{c}^{(k)}$  follows (8). For the full conditional of  $(\boldsymbol{\gamma}^{(k)}, \tilde{\boldsymbol{\beta}}^{(k)})$ ,

$$\begin{aligned}\pi(\boldsymbol{\gamma}_{rh'}^{(k)} | \bullet) &= \int \pi(\tilde{\boldsymbol{\beta}}_{rh'}^{(k)}, \boldsymbol{\gamma}_{rh'}^{(k)} | \bullet) d\tilde{\boldsymbol{\beta}}_{rh'}^{(k)} \propto \phi(\mathbf{0}; \boldsymbol{\mu}_{rh'}^{(k)}, \boldsymbol{\Sigma}_{rh'}^{(k)}), \\ \pi(\tilde{\boldsymbol{\beta}}_{rh'1}^{(k)} | \boldsymbol{\gamma}_{rh'}^{(k)}, \bullet) &= \phi(\tilde{\boldsymbol{\beta}}_{rh'1}^{(k)}; \boldsymbol{\mu}_{rh'1}^{(k)}, \boldsymbol{\Sigma}_{rh'1}^{(k)}), \\ \pi(\tilde{\boldsymbol{\beta}}_{rh'0}^{(k)} | \boldsymbol{\gamma}_{rh'}^{(k)}, \bullet) &= \delta_{\mathbf{0}}(\tilde{\boldsymbol{\beta}}_{rh'0}^{(k)}),\end{aligned}$$

with

$$\begin{aligned}\boldsymbol{\Sigma}_{rh'}^{(k)} &= \left( \sigma_\beta^{-2(k)} \mathbf{I} + \mathbf{X}_{rh'}^\top \mathbf{X}_{rh'} \right)^{-1}; \\ \boldsymbol{\mu}_{rh'}^{(k)} &= \boldsymbol{\Sigma}_{rh'}^{(k)} \mathbf{X}_{rh'}^\top (\mathbf{z}^{(k)} - \mathbf{S}\boldsymbol{\alpha}^{(k)}),\end{aligned}\tag{10}$$

where  $\mathbf{X}_{rh'} = (\mathbf{x}_{rv}, a_{rvh}^{(k)} = 1; \boldsymbol{\gamma}_{rh}^{(k)} = 1; \tilde{a}_{rhh'}^{(k)} = 1)$ .

- when  $1 < k < K$ , the sampling scheme is stated in Section 3.3.
- when  $k = K$ , the sampling scheme is stated in Section 3.3 with the full conditional updates of  $c_g^{(k)}$  and  $(\boldsymbol{\gamma}^{(k)}, \tilde{\boldsymbol{\beta}}^{(k)})$  in the moving step.

## References

- [1] J. Møller, A. N. Pettitt, R. Reeves, and K. K. Berthelsen, “An efficient markov chain monte carlo method for distributions with intractable normalising constants,” *Biometrika*, vol. 93, no. 2, pp. 451–458, 2006.
